# Supplementary material
Source: PubMed Central journal article supplement (PMC3194932)
Supplement: supp_85_21_10945__1.pdf [file supp_85_21_10945__1.pdf]

| Supplementary Table-1 - Frequency of selected phage clones with H5N1-VLP vaccinated individuals using H5N1-Indonesia GFPDL |                                                                                                                                                                                   |                       |           |           |           |
|----------------------------------------------------------------------------------------------------------------------------|-----------------------------------------------------------------------------------------------------------------------------------------------------------------------------------|-----------------------|-----------|-----------|-----------|
| Seq Region                                                                                                                 | Peptide Sequence                                                                                                                                                                  | VLP-NOVA-Indonesia 06 |           |           |           |
|                                                                                                                            |                                                                                                                                                                                   | Placebo               | VLP-15 ug | VLP-45 ug | VLP-90 ug |
| HA1                                                                                                                        |                                                                                                                                                                                   |                       |           |           |           |
| HA-4-20                                                                                                                    | IVLLLAIVSLVKSDQIC                                                                                                                                                                 |                       |           | 1         | 2         |
| HA-12-90                                                                                                                   | SLVKSDQICIGYHANNSTEQVDTIMEKNVTVTHAQDILEKTHNGKLCDDL<br>GVKPLILRDCSVAGWLLGNPMCDEFINVP                                                                                               |                       |           | 3         | 9         |
| HA-23-145                                                                                                                  | YHANNSTEQVDTIMEKNVTVTHAQDILEKTHNGKLCDDLGVKPLILRDC<br>SVAGWLLGNPMCDEFINVPESYIVEKANPTNDLCYPGSFNDEEELKH<br>LLSRINHFEEKIIPKSSWSDHEASS                                                 |                       |           |           | 1         |
| HA-28-148                                                                                                                  | STEQVDTIMEKNVTVTHAQDILEKTHNGKLCDDLGVKPLILRDCSVAGW<br>LLGNPMCDEFINVPESYIVEKANPTNDLCYPGSFNDEEELKHLISRIN<br>HFEEKIIPKSSWSDHEASSGV                                                    | 1                     |           | 2         | 3         |
| HA-61-96                                                                                                                   | DGVKPLILRDCSVAGWLLGNPMCDEFINVPESYIV                                                                                                                                               |                       | 1         | 1         | 1         |
| HA-83-203                                                                                                                  | CDEFINVPESYIVEKANPTNDLCYPGSFNDEEELKHLISRINHFEEKIIP<br>PKSSWSDHEASSGVSSACPYLGSFRRNVVWLIKKNSTYPTIKKSYN<br>NTNQEDLLVWGIHHPNDAAEQ                                                     |                       |           | 4         | 5         |
| HA-98-199                                                                                                                  | KANPTNDLCYPGSFNDEEELKHLISRINHFEEKIIPKSSWSDHEASSGV<br>SSACPYLGSFRRNVVWLIKKNSTYPTIKKSYNNTNQEDLLVWGIH<br>PND                                                                         |                       |           | 1         |           |
| HA-100-212                                                                                                                 | NPTNDLCYPGSFNDEEELKHLISRINHFEEKIIPKSSWSDHEASSGVSS<br>ACPYLGSFRRNVVWLIKKNSTYPTIKKSYNNTNQEDLLVWGIHHPN<br>DAEQTRLYQNPTT                                                              |                       |           |           | 5         |
| HA-109-147                                                                                                                 | GSFNDEEELKHLISRINHFEEKIIPKSSWSDHEASSGV                                                                                                                                            |                       |           | 1         | 7         |
| HA-112-189                                                                                                                 | NDYEELKHLISRINHFEEKIIPKSSWSDHEASSGVSSACPYLGSFRR<br>NVVWLIKKNSTYPTIKKSYNNTNQEDLL                                                                                                   |                       |           |           | 5         |
| HA-116-189                                                                                                                 | ELKHLISRINHFEEKIIPKSSWSDHEASSGVSSACPYLGSFRRNV<br>WLIKKNSTYPTIKKSYNNTNQEDLL                                                                                                        |                       |           | 3         | 1         |
| HA-120-242                                                                                                                 | LLSRINHFEEKIIPKSSWSDHEASSGVSSACPYLGSFRRNVVWLIK<br>NSTYPTIKKSYNNTNQEDLLVWGIHHPNDAAEQTRLYQNPTTYISIGTS<br>TLNQRLVPKIATRISKVNGQSGRM                                                   | 1                     |           |           |           |
| HA-124-159                                                                                                                 | INHFEKIIPKSSWSDHEASSGVSSACPYLGSF                                                                                                                                                  |                       | 1         | 1         | 1         |
| HA-135-200                                                                                                                 | KSSWSDHEASSGVSSACPYLGSFRRNVVWLIKKNSTYPTIKKSYNN<br>TNQEDLLVWGIHHPNDA                                                                                                               |                       |           | 1         | 6         |
| HA-136-305                                                                                                                 | SSWSDHEASSGVSSACPYLGSFRRNVVWLIKKNSTYPTIKKSYNNT<br>NQEDLLVWGIHHPNDAAEQTRLYQNPTTYISIGTSTLNQRLVPKIATR<br>KVNGQSGRMEFFWTILKPNDAINFESNGNFIAPYAYKIVKKGDSAIMKS<br>ELEYGNCNTKCQTPMGAINSSM |                       |           | 1         | 3         |
| HA-140-200                                                                                                                 | DHEASSGVSSACPYLGSFRRNVVWLIKKNSTYPTIKKSYNNTNQEDL<br>LVLWGIHHPNDA                                                                                                                   |                       |           |           | 1         |
| HA-140-204                                                                                                                 | DHEASSGVSSACPYLGSFRRNVVWLIKKNSTYPTIKKSYNNTNQEDL<br>LVLWGIHHPNDAAEQT                                                                                                               |                       |           | 2         | 1         |
| HA-145-276                                                                                                                 | SGVSSACPYLGSFRRNVVWLIKKNSTYPTIKKSYNNTNQEDLLVW<br>GIHHPNDAAEQTRLYQNPTTYISIGTSTLNQRLVPKIATRISKVNGQSGRME<br>FFWTILKPNDAINFESNGNFIAPYAYKIVKKG                                         |                       |           | 1         | 4         |

|              |                                                                                                                                                                             |          |          |           |            |
|--------------|-----------------------------------------------------------------------------------------------------------------------------------------------------------------------------|----------|----------|-----------|------------|
| HA-145-302   | SGVSSACPYLGSPSFFRNVVWLIKKNSTYPTIKKSYNNTNQEDLLVLWG<br>IHHPNDAAEQTRLYQNPTTYISIGTSTLNQRLVPKIATRISKVNGQSGRME<br>FFWTILKPNDAINFESNGNFIAPEYAYKIVKKGDSAIMKSELEYGNCNTK<br>CQTPMGAIN |          |          |           | 3          |
| HA-167-245   | IKKNSTYPTIKKSYNNTNQEDLLVLWGIHHPNDAAEQTRLYQNPTTYISIG<br>TSTLNQRLVPKIATRISKVNGQSGRMEFF                                                                                        |          |          | 2         | 7          |
| HA-170-212   | NSTYPTIKKSYNNTNQEDLLVLWGIHHPNDAAEQTRLYQNPTT                                                                                                                                 |          |          | 1         | 4          |
| HA-173-247   | YPTIKKSYNNTNQEDLLVLWGIHHPNDAAEQTRLYQNPTTYISIGTSTLN<br>QRLVPKIATRISKVNGQSGRMEFFWT                                                                                            |          |          | 14        | 1          |
| HA-202-210   | EQTRLYQNP                                                                                                                                                                   |          |          | 1         | 2          |
| ha-204-301   | TRLYQNPTTYISIGTSTLNQRLVPKIATRISKVNGQSGRMEFFWTILKPN<br>DAINFESNGNFIAPEYAYKIVKKGDSAIMKSELEYGNCNTKCQTPMGAI                                                                     |          | 2        |           | 1          |
| HA-207-245   | YQNPTTYISIGTSTLNQRLVPKIATRISKVNGQSGRMEFF                                                                                                                                    |          | 1        |           | 1          |
| HA-207-301   | YQNPTTYISIGTSTLNQRLVPKIATRISKVNGQSGRMEFFWTILKPNDAI<br>NFESNGNFIAPEYAYKIVKKGDSAIMKSELEYGNCNTKCQTPMGAI                                                                        |          | 1        | 1         | 1          |
| HA-233-312   | SKVNGQSGRMEFFWTILKPNDAINFESNGNFIAPEYAYKIVKKGDSAIMK<br>SELEYGNCNTKCQTPMGAINSSMPFHNIHP                                                                                        |          |          | 1         | 6          |
| HA-245-312   | PNDAINFESNGNFIAPEYAYKIVKKGDSAIMKSELEYGNCNTKCQTPMG<br>AINSSMPFHNIHP                                                                                                          |          |          | 1         | 13         |
| HA-245-313   | PNDAINFESNGNFIAPEYAYKIVKKGDSAIMKSELEYGNCNTKCQTPMG<br>AINSSMPFHNIHPL                                                                                                         |          |          | 1         | 9          |
| HA-248-335   | ILKPNDAINFESNGNFIAPEYAYKIVKKGDSAIMKSELEYGNCNTKCQTP<br>MGAINSSMPFHNIHPLTIGECPKYVKSRLVATGLRN                                                                                  |          |          |           | 6          |
| HA-248-337   | ILKPNDAINFESNGNFIAPEYAYKIVKKGDSAIMKSELEYGNCNTKCQTP<br>MGAINSSMPFHNIHPLTIGECPKYVKSRLVATGLRNSP                                                                                |          |          | 1         | 5          |
| HA-250-362   | KPNDAINFESNGNFIAPEYAYKIVKKGDSAIMKSELEYGNCNTKCQTPM<br>GAINSSMPFHNIHPLTIGECPKYVKSRLVATGLRNSPQRESRRKRG<br>LFGAIAGFIEGGWQG                                                      |          |          | 2         | 1          |
| HA-250-360   | KPNDAINFESNGNFIAPEYAYKIVKKGDSAIMKSELEYGNCNTKCQTPM<br>GAINSSMPFHNIHPLTIGECPKYVKSRLVATGLRNSPQRESRRKRG<br>LFGAIAGFIEGGW                                                        |          |          | 11        | 8          |
| HA-256-308   | NFESNGNFIAPEYAYKIVKKGDSAIMKSELEYGNCNTKCQTPMGAINSS<br>MPFH                                                                                                                   |          | 1        |           | 1          |
| HA-256-341   | NFESNGNFIAPEYAYKIVKKGDSAIMKSELEYGNCNTKCQTPMGAINSS<br>MPFHNIHPLTIGECPKYVKSRLVATGLRNSPQRES                                                                                    |          |          |           | 2          |
| HA-259-312   | SNGNFIAPEYAYKIVKKGDSAIMKSELEYGNCNTKCQTPMGAINSSMPF<br>HNIHP                                                                                                                  |          | 2        | 1         | 1          |
| <b>TOTAL</b> |                                                                                                                                                                             | <b>2</b> | <b>9</b> | <b>58</b> | <b>127</b> |
| <b>HA2</b>   |                                                                                                                                                                             |          |          |           |            |
| HA-345-432   | KRGLFGAIAGFIEGGWQGMVDGWYGYHHSNEQGSYAADKESTQKAI<br>DGVTNKVNSIIDKMNTQFEAVGREFNNLERRIENLNKKMED                                                                                 |          |          |           | 5          |
| HA-345-477   | KRGLFGAIAGFIEGGWQGMVDGWYGYHHSNEQGSYAADKESTQKAI<br>DGVTNKVNSIIDKMNTQFEAVGREFNNLERRIENLNKKMEDGFLDVWT<br>YNAELLVLMENERTLDFHDSNVKNLYDKVRLQLRDNK                                 |          |          |           | 7          |
| HA-356-438   | IEGGWQGMVDGWYGYHHSNEQGSYAADKESTQKAI<br>DGVTNKVNSIIDKMNTQFEAVGREFNNLERRIENLNKKMEDGFLDVW                                                                                      | 3        | 5        |           | 1          |

|            |                                                                                                                             |   |    |    |    |
|------------|-----------------------------------------------------------------------------------------------------------------------------|---|----|----|----|
| HA-356-445 | IEGGWQGMVDGWYGYHHSNEQSGSYAADKESTQKAIDGVTNKVNSIIDKMNTQFEAVGREFNNLERRIENLNKKMEDGFLDVWTYNAELL                                  | 1 | 6  |    | 1  |
| HA-360-425 | WQGMVDGWYGYHHSNEQSGSYAADKESTQKAIDGVTNKVNSIIDKMNTQFEAVGREFNNLERRIEN                                                          |   |    |    | 7  |
| HA-360-402 | WQGMVDGWYGYHHSNEQSGSYAADKESTQKAIDGVTNKVNSIID                                                                                |   |    |    | 26 |
| HA-360-403 | WQGMVDGWYGYHHSNEQSGSYAADKESTQKAIDGVTNKVNSIID                                                                                |   |    | 1  | 32 |
| HA-365-476 | DGWYGYHHSNEQSGSYAADKESTQKAIDGVTNKVNSIIDKMNTQFEAVGREFNNLERRIENLNKKMEDGFLDVWTYNAELLVLMENERTLDFHDSNVKNLYDKVRLQLRDNA            |   |    |    | 7  |
| HA-372-494 | HSNEQSGSYAADKESTQKAIDGVTNKVNSIIDKMNTQFEAVGREFNNLERRIENLNKKMEDGFLDVWTYNAELLVLMENERTLDFHDSNVKNLYDKVRLQLRDNAKELGNGCFEFYHKCDNEC |   |    | 5  | 1  |
| HA-375-380 | EQSGSY                                                                                                                      |   |    | 37 | 51 |
| HA-379-416 | GYAADKESTQKAIDGVTNKVNSIIDKMNTQFEAVGREF                                                                                      | 1 | 89 |    | 1  |
| HA-380-416 | YAADKESTQKAIDGVTNKVNSIIDKMNTQFEAVGREF                                                                                       | 1 |    |    | 1  |
| HA-381-452 | AADKESTQKAIDGVTNKVNSIIDKMNTQFEAVGREFNNLERRIENLNKKMEDGFLDVWTYNAELLVLMENERT                                                   | 8 |    |    | 1  |
| HA-381-498 | AADKESTQKAIDGVTNKVNSIIDKMNTQFEAVGREFNNLERRIENLNKKMEDGFLDVWTYNAELLVLMENERTLDFHDSNVKNLYDKVRLQLRDNAKELGNGCFEFYHKCDNECMESI      |   |    | 4  | 1  |
| HA-385-477 | STQKAIDGVTNKVNSIIDKMNTQFEAVGREFNNLERRIENLNKKMEDGFLDVWTYNAELLVLMENERTLDFHDSNVKNLYDKVRLQLRDNAK                                | 5 |    |    | 1  |
| HA-387-451 | TQKAIDGVTNKVNSIIDKMNTQFEAVGREFNNLERRIENLNKKMEDGFLDVWTYNAELLVLMENE                                                           |   |    |    | 1  |
| HA-392-450 | DGVTNKVNSIIDKMNTQFEAVGREFNNLERRIENLNKKMEDGFLDVWTYNAELLVLMEN                                                                 |   |    |    | 3  |
| HA-396-445 | NKVNSIIDKMNTQFEAVGREFNNLERRIENLNKKMEDGFLDVWTYNAELL                                                                          |   |    | 1  | 27 |
| HA-390-501 | AIDGVTNKVNSIIDKMNTQFEAVGREFNNLERRIENLNKKMEDGFLDVWTYNAELLVLMENERTLDFHDSNVKNLYDKVRLQLRDNAKELGNGCFEFYHKCDNECMESIRNG            |   |    |    | 5  |
| HA-396-476 | DNKVNSIIDKMNTQFEAVGREFNNLERRIENLNKKMEDGFLDVWTYNAELLVLMENERTLDFHDSNVKNLYDKVRLQLRDNA                                          |   |    | 16 | 1  |
| HA-395-452 | TNKVNSIIDKMNTQFEAVGREFNNLERRIENLNKKMEDGFLDVWTYNAELLVLMENER                                                                  |   |    |    | 1  |
| HA-398-494 | KVNSIIDKMNTQFEAVGREFNNLERRIENLNKKMEDGFLDVWTYNAELLVLMENERTLDFHDSNVKNLYDKVRLQLRDNAKELGNGCFEFYHKCDNEC                          |   |    |    | 4  |
| HA-399-501 | NSIIDKMNTQFEAVGREFNNLERRIENLNKKMEDGFLDVWTYNAELLVLMENERTLDFHDSNVKNLYDKVRLQLRDNAKELGNGCFEFYHKCDNECMESIRNG                     | 1 |    |    | 1  |
| HA-413-524 | GREFNNLERRIENLNKKMEDGFLDVWTYNAELLVLMENERTLDFHDSNVKNLYDKVRLQLRDNAKELGNGCFEFYHKCDNECMESIRNGTYNYPQYSEEARLKREEISGVKL            |   | 1  | 4  | 1  |
| HA-415-473 | EFNNLERRIENLNKKMEDGFLDVWTYNAELLVLMENERTLDFHDSNVKNLYDKVRLQLR                                                                 |   |    |    | 19 |

|              |                                                                                                                                                                                                                                                                     |           |            |            |            |
|--------------|---------------------------------------------------------------------------------------------------------------------------------------------------------------------------------------------------------------------------------------------------------------------|-----------|------------|------------|------------|
| HA-415-474   | EFNNLERRIENLNKKMEDGFLDVWTYNAELLVLMENERTLDFHDSNVK<br>NLYDKVRLQLRD                                                                                                                                                                                                    |           |            | 38         | 1          |
| HA-415-476   | EFNNLERRIENLNKKMEDGFLDVWTYNAELLVLMENERTLDFHDSNVK<br>NLYDKVRLQLRDNA                                                                                                                                                                                                  |           | 28         | 39         | 59         |
| HA-425-475   | NLNKKMEDGFLDVWTYNAELLVLMENERTLDFHDSNVKNLYDKVRLQL<br>RDN                                                                                                                                                                                                             | 0         | 0          | 0          | 71         |
| <b>TOTAL</b> |                                                                                                                                                                                                                                                                     | <b>20</b> | <b>129</b> | <b>145</b> | <b>337</b> |
| <b>NA</b>    |                                                                                                                                                                                                                                                                     |           |            |            |            |
| NA-599-722   | SIWVIHSIQTNQHQAESISNTNPLTEKAVASVTLAGNSSLCPIRGWAVH<br>SKDNNIRIGSKGDVFIREFPISCHECRTFFLTQGALLNDKHSNGTVK<br>DRSPHRTLMSCPVGGEAPSPYNSRF                                                                                                                                   | 1         |            | 5          | 6          |
| NA-607-855   | QTGNQHQAESISNTNPLTEKAVASVTLAGNSSLCPIRGWAVH<br>GSKGDVFIREFPISCHECRTFFLTQGALLNDKHSNGTVKDRSPHRT<br>LMSCPVGGEAPSPYNSRFESVAWSASACHDGTSWLTIGISGPDNEAVAV<br>LKYNGIITDTIKSWRNDILRTQESECACVNGSCFTVMTDGPSNGQASYK<br>IFKMEKGKVVKSVELDAPNYHYEECSCYPDAGEITCVCRDNWHGSRN<br>PWVSFN |           |            |            | 1          |
| NA-628-668   | VASVTLAGNSSLCPIRGWAVH<br>SKDNNIRIGSKGDVFIREFPISCHECRTFFLTQGALLNDKHS<br>NGTVKDRSPHRTLMSCPVGGEAPSPYNSRFESVAWSASACHDGT<br>SW                                                                                                                                           |           |            |            | 1          |
| NA-644-738   | GWAVH<br>SKDNNIRIGSKGDVFIREFPISCHECRTFFLTQGALLNDKHS<br>NGTVKDRSPHRTLMSCPVGGEAPSPYNSRFESVAWSASACHDGT<br>SW                                                                                                                                                           | 1         |            |            |            |
| NA-669-738   | IREPFISCHECRTFFLTQGALLNDKHSNGTVKDRSPHRTLMSCPVG<br>EAPSPYNSRFESVAWSASACHDGT                                                                                                                                                                                          |           | 4          | 25         | 28         |
| NA-672-722   | CSHLECRTFFLTQGALLNDKHSNGTVKDRSPHRTLMSCPVG<br>EAPSPYNSRF                                                                                                                                                                                                             | 1         |            |            |            |
| NA-674-744   | ISCSHLECRTFFLTQGALLNDKHSNGTVKDRSPHRTLMSCPVG<br>EAPSPYNSRFESVAWSASACHDGTSWLT                                                                                                                                                                                         |           | 3          |            |            |
| NA-695-765   | KHSNGTVKDRSPHRTLMSCPVG<br>EAPSPYNSRFESVAWSASACHDGT<br>SWLTIGISGPDNEAVLKYNGIIT                                                                                                                                                                                       |           | 2          | 29         | 32         |
| NA-697-860   | VKDRSPHRTLMSCPVG<br>EAPSPYNSRFESVAWSASACHDGT<br>SWLTIGISGPDNEAVLKYNGIITDTIKSWRNDILRTQESECACVNGSCFTVMTDG<br>PSNGQASYKIFKMEKGKVVKSVELDAPNYHYEECSCYPDAGEITCVCR<br>DNWHGSRNPWVSFNQNLLEY                                                                                 |           |            |            | 1          |
| NA-708-849   | SCPVG<br>EAPSPYNSRFESVAWSASACHDGT<br>SWLTIGISGPDNEAVLKYNGIITDTIKSWRNDILRTQESECACVNGSCFTVMTDG<br>PSNGQASYKIFKMEKGKVVKSVELDAPNYHYEECSCYPDAGEITCVCRDNWHGSRN                                                                                                            |           |            |            | 1          |
| NA-710-728   | PVG<br>EAPSPYNSRFESVAWS                                                                                                                                                                                                                                             |           |            |            | 1          |
| NA-716-767   | SPYNSRFESVAWSASACHDGT<br>SWLTIGISGPDNEAVLKYNGIITDTIK<br>SW                                                                                                                                                                                                          |           |            |            | 1          |
| NA-725-899   | VAWSASACHDGT<br>SWLTIGISGPDNEAVLKYNGIITDTIKSWRNDILRTQESECACVNGSCFTVMTDG<br>PSNGQASYKIFKMEKGKVVKSVELDAPNYHYEECSCYPDAGEITCVCRDNWHGSRN<br>PWVSFNQNLLEYQIGYICSGVFGDNPRPNDGTGSCGPMSPNGAYGVKGF                                                                            |           |            |            | 1          |
| NA-734-804   | DGT<br>SWLTIGISGPDNEAVLKYNGIITDTIKSWRNDILRTQESECACVNGSCFTVMTDG<br>PSNGQASYKIF                                                                                                                                                                                       | 3         |            |            |            |

|              |                                                                                                                                                                                                    |           |           |            |            |
|--------------|----------------------------------------------------------------------------------------------------------------------------------------------------------------------------------------------------|-----------|-----------|------------|------------|
| NA-749-820   | EAVAVLKYNGIITDTIKSWRNDILRTQESECACVNGSCFTVMTDGPSNG<br>QASYKIFKMEKGKVVKSVELDAP                                                                                                                       | 1         |           |            |            |
| NA-762-851   | DTIKSWRNDILRTQESECACVNGSCFTVMTDGPSNGQASYKIFKMEKG<br>KVVKSVELDAPNYHYEECSCYPDAGEITCVCRDNWHGSRNPW                                                                                                     |           |           |            | 1          |
| NA789-975    | VMTDGPSNGQASYKIFKMEKGKVVKSVELDAPNYHYEECSCYPDAGEI<br>TCVCRDNWHGSRNPWVSFNQNLEYQIGYICSGVFGDNPRPNDGTGS<br>CGPMSPNGAYGVKGFsfkyngvwigrtkstnsrsgfemiwdpngw<br>TGTDSFSVKQDIVAITDWSGYSGSFVQHPGLDCIRPCFWVELI | 1         |           |            |            |
| NA-789-948   | VMTDGPSNGQASYKIFKMEKGKVVKSVELDAPNYHYEECSCYPDAGEI<br>TCVCRDNWHGSRNPWVSFNQNLEYQIGYICSGVFGDNPRPNDGTGS<br>CGPMSPNGAYGVKGFsfkyngvwigrtkstnsrsgfemiwdpngw<br>TGTDSFSVKQDIVAITDWS                         |           |           |            | 1          |
| NA-792-905   | DGPSNGQASYKIFKMEKGKVVKSVELDAPNYHYEECSCYPDAGEITCV<br>CRDNWHGSRNPWVSFNQNLEYQIGYICSGVFGVVKVELDAPNYHGDN<br>PRPNDGTGSCGPMSPNGAYGVKGFsf                                                                  | 1         |           |            |            |
| NA-792-939   | DGPSNGQASYKIFKMEKGKVVKSVELDAPNYHYEECSCYPDAGEITCV<br>CRDNWHGSRNPWVSFNQNLEYQIGYICSGVFGDNPRPNDGTGSCGP<br>MSPNGAYGVKGFsfkyngvwigrtkstnsrsgfemiwdpngwtgt<br>DSSFSVKQ                                    |           |           |            | 1          |
| NA-811-864   | YEECSCYPDAGEITCVCRDNWHGSRNPWVSFNQNLEYQIG                                                                                                                                                           | 1         | 5         | 17         | 21         |
| NA-832-919   | DAGEITCVCRDNWHGSRNPWVSFNQNLEYQIGYICSGVFGDNPRPND<br>GTGSCGPMSPNGAYGVKGFsfkyngvwigrtkstnsrsgf                                                                                                        |           |           |            | 1          |
| NA-832-958   | DAGEITCVCRDNWHGSRNPWVSFNQNLEYQIGYICSGVFGDNPRPND<br>GTGSCGPMSPNGAYGVKGFsfkyngvwigrtkstnsrsgfemiwdp<br>NGWTGTDSSFSVKQDIVAITDWSGYSGSFVQHP                                                             |           |           | 5          | 2          |
| NA-850-899   | PWVSFNQNLEYQIGYICSGVFGDNPRPNDGTGSCGPMSPNGAYGVKG<br>FSF                                                                                                                                             | 1         |           |            |            |
| NA-865-930   | ICSGVFGDNPRPNDGTGSCGPMSPNGAYGVKGFsfkyngvwigrtk<br>STNSRSGFEMIWDPNGWTG                                                                                                                              | 3         | 5         | 44         | 46         |
| NA-886-939   | MSPNGAYGVKGFsfkyngvwigrtkstnsrsgfemiwdpngwtgt<br>DSSFSVKQ                                                                                                                                          |           |           |            | 1          |
| NA-920-929   | EMIWDPNGWT                                                                                                                                                                                         |           |           | 13         | 17         |
| NA-920-955   | EMIWDPNGWTGTDSSFSVKQDIVAITDWSGYSGSFV                                                                                                                                                               |           |           |            | 1          |
| NA-920-957   | EMIWDPNGWTGTDSSFSVKQDIVAITDWSGYSGSFVQH                                                                                                                                                             |           |           | 6          | 1          |
| NA-920-956   | EMIWDPNGWTGTDSSFSVKQDIVAITDWSGYSGSFVQ                                                                                                                                                              |           |           |            | 1          |
| NA-948-1004  | SGYSGSFVQHPGLDCIRPCFWVELIRGRPKESTIWTSGSSISFCGV<br>NSDTVSW                                                                                                                                          |           |           | 1          |            |
| NA-978-1004  | RPKESTIWTSGSSISFCGVNSDTVSW                                                                                                                                                                         |           | 2         | 46         | 47         |
| <b>TOTAL</b> |                                                                                                                                                                                                    | <b>14</b> | <b>21</b> | <b>191</b> | <b>214</b> |
